# Supplementary material for: Sensitivity Analysis of the Surface Ozone and Fine Particulate Matter to Meteorological Parameters in China
Source: Copernicus journal article supplement (doi:10.5194/acp-2020-173), 2020-03-02
Supplement: Supplementary file 1 [file acp-2020-173-supplement.pdf]

1 **Supplemental Materials**

2

3

4 **Sensitivity Analysis of the Surface Ozone and Fine**  
5 **Particulate Matter to Meteorological Parameters in China**

6 Zhihao Shi<sup>1</sup>, Lin Huang<sup>1</sup>, Jingyi Li<sup>1</sup>, Qi Ying<sup>2</sup>, Hongliang Zhang<sup>3,4</sup>, Jianlin Hu<sup>1\*</sup>

7

8 <sup>1</sup>Jiangsu Key Laboratory of Atmospheric Environment Monitoring and Pollution  
9 Control, Collaborative Innovation Center of Atmospheric Environment and  
10 Equipment Technology, Nanjing University of Information Science & Technology,  
11 Nanjing 210044, China

12 <sup>2</sup>Zachry Department of Civil and Environmental Engineering, Texas A&M University,  
13 College Station, TX 77843, USA

14 <sup>3</sup>Department of Environmental Science and Engineering, Fudan University, Shanghai  
15 200438, China

16 <sup>4</sup>Institute of Eco-Chongming (SIEC), Shanghai 200062, China

17

18

19 \*Corresponding authors:

20 Jianlin Hu, Email: [jianlinhu@nuist.edu.cn](mailto:jianlinhu@nuist.edu.cn). Phone: +86-25-58731504.

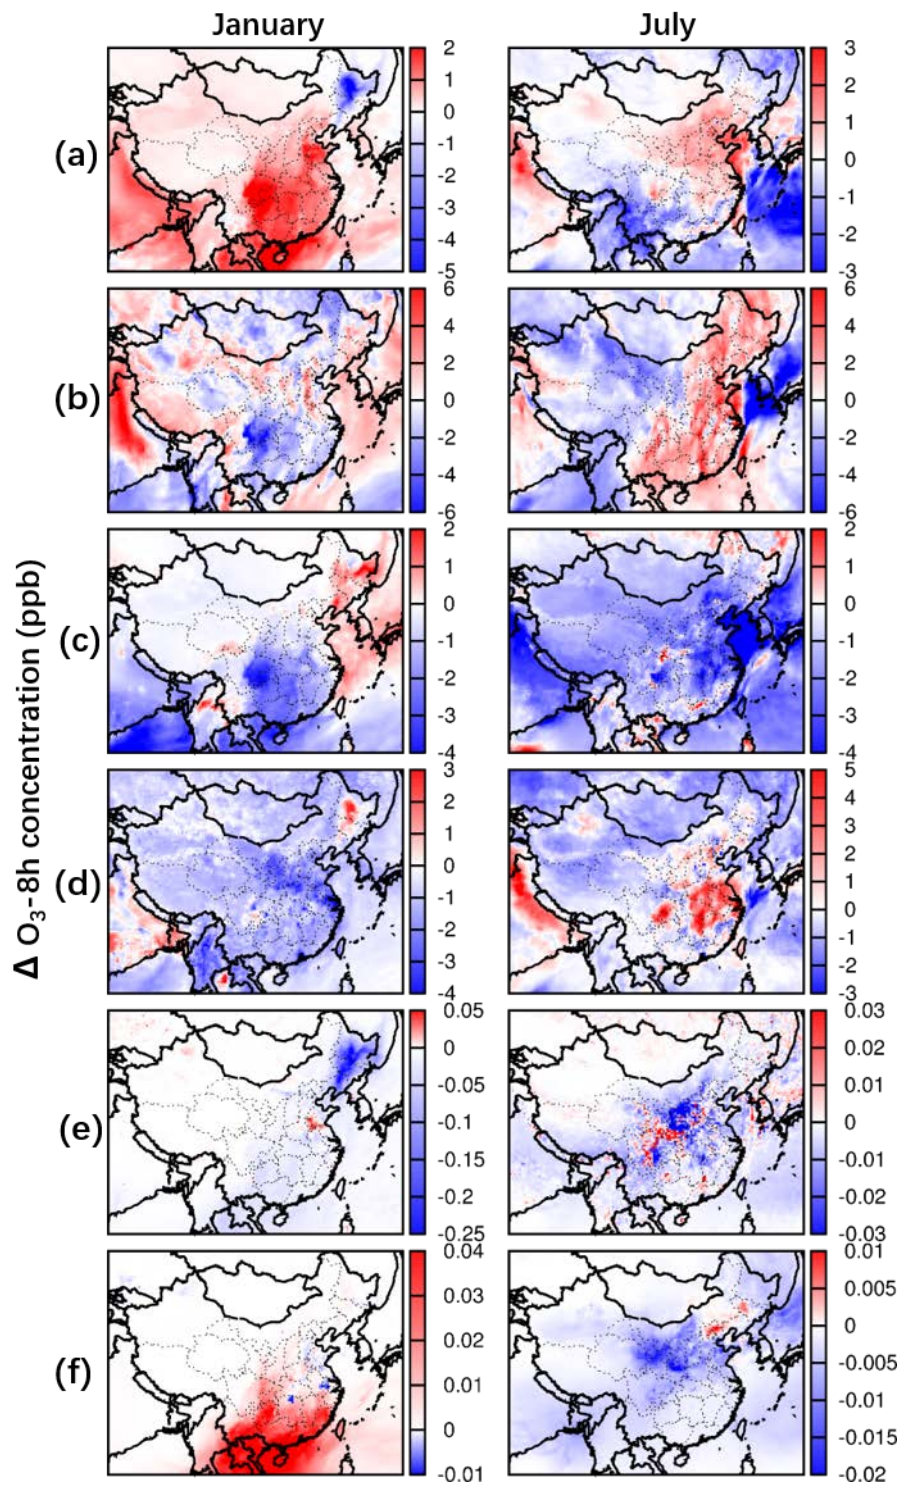

22

23 **Fig.S1** Changes in monthly average O<sub>3</sub>-8h (ppb) in January and July, 2013 due to (a) T+1.5K, (b)

24 WS-20%, (c) AH+20%, (d) PBLH-30%, (e) CLW+20%, (f) PCP+20%.

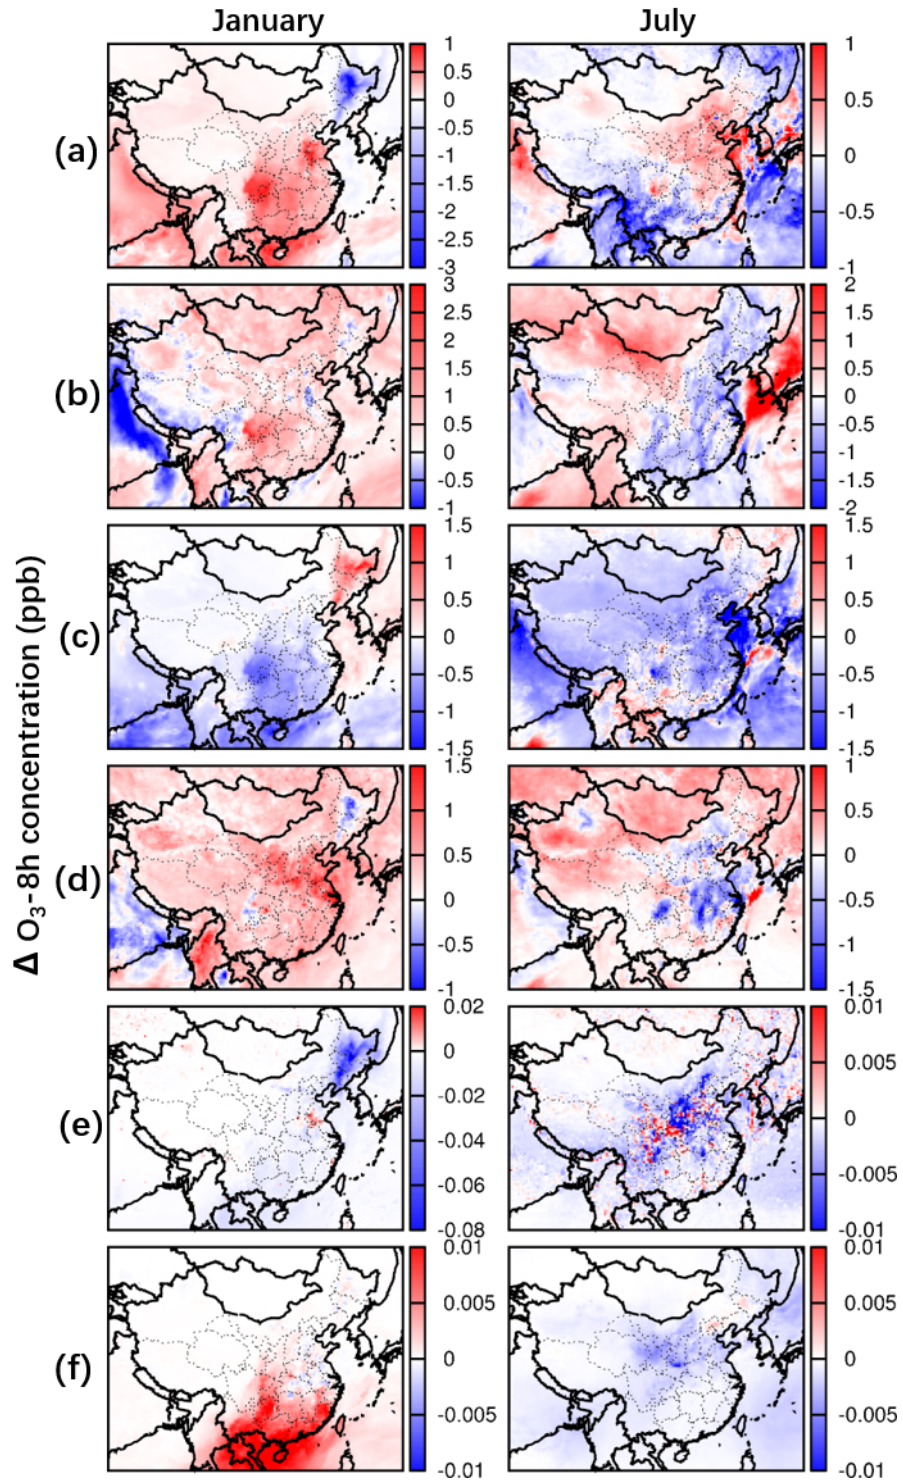

25

26 **Fig.S2** Changes in monthly average O<sub>3</sub>-8h (ppb) in January and July, 2013 due to (a) T+0.5K, (b)

27 WS+5%, (c) AH+5%, (d) PBLH+10%, (e) CLW+5%, (f) PCP+5%.

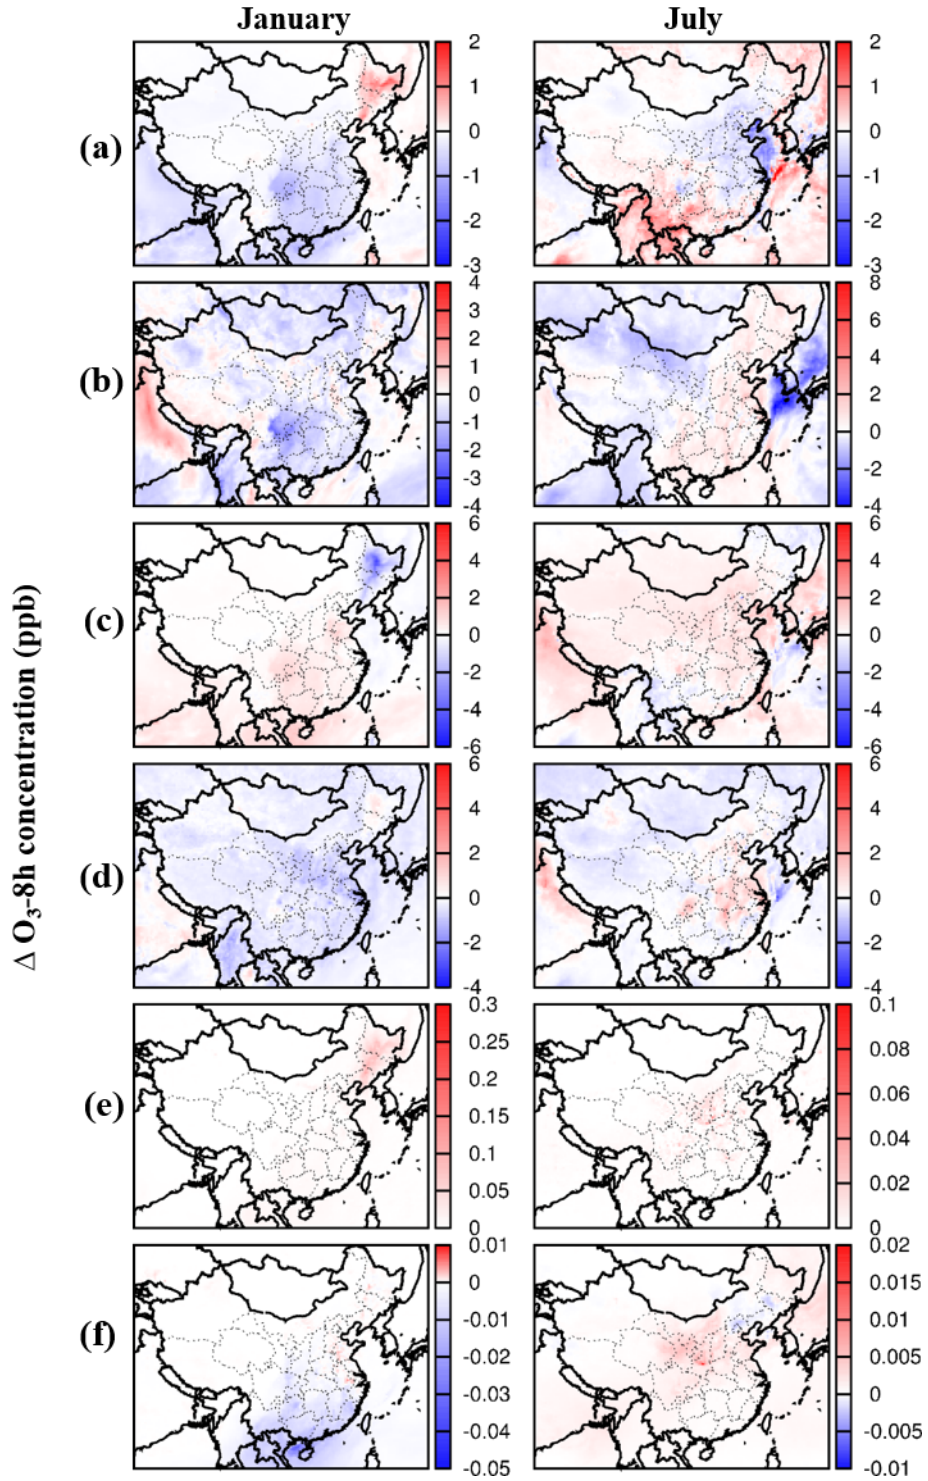

28

29 **Fig. S3** Changes in monthly average  $O_3\text{-}8\text{h}$  (ppb) in January and July, 2013 due to (a) T-0.5K, (b)

30 WS-5%, (c) AH-5%, (d) PBLH-10%, (e) CLW-5%, (f) PCP-5%.

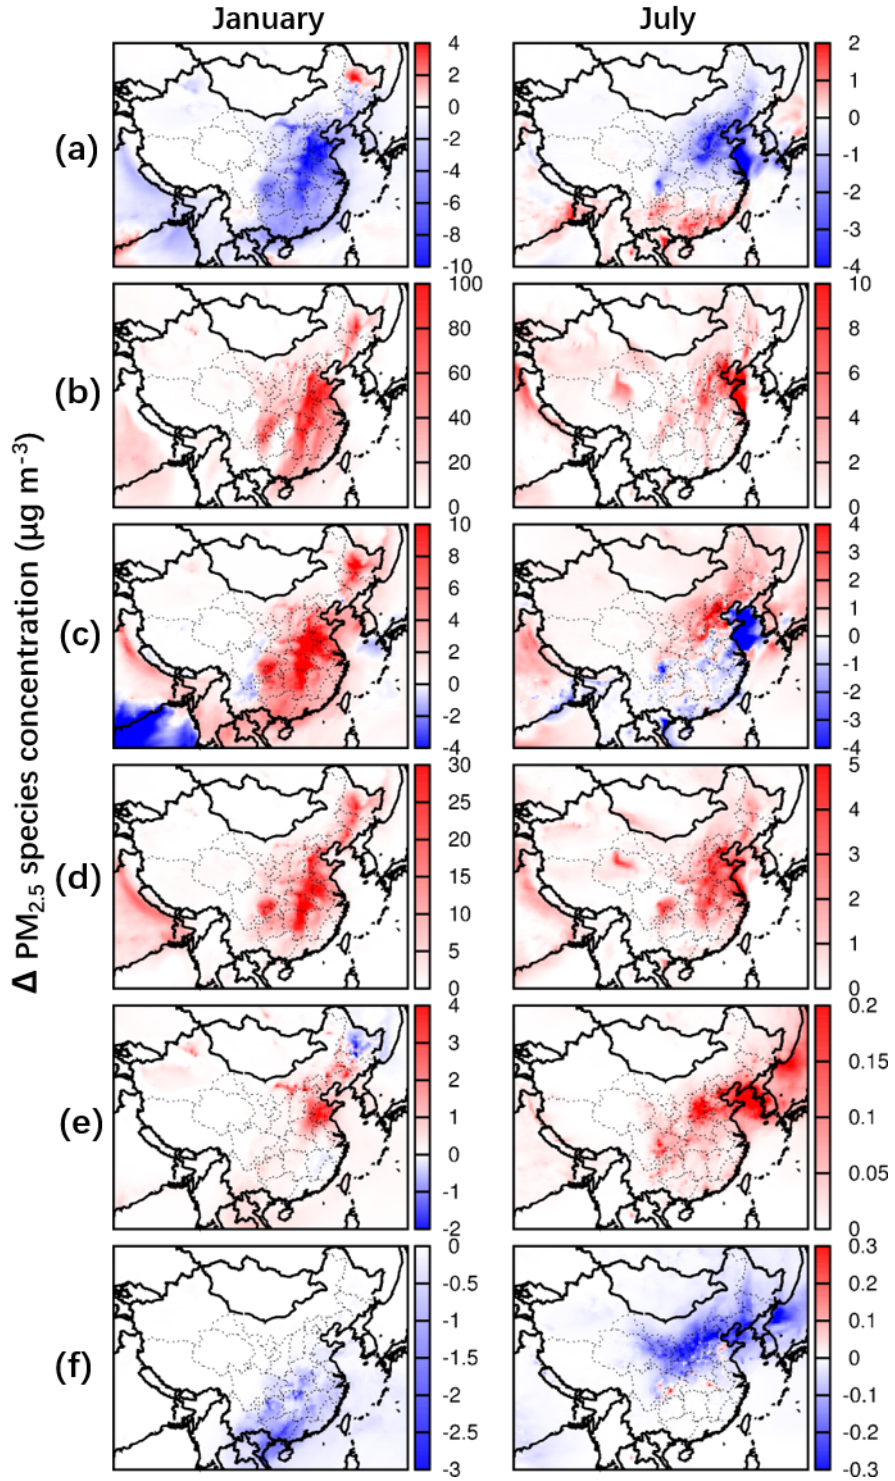

31

32 **Fig.S4** Changes in monthly average PM<sub>2.5</sub> concentration (µg m<sup>-3</sup>) in January and July, 2013 due to

33 (a) T+1.5K, (b) WS-20%, (c) AH+20%, (d) PBLH-30%, (e) CLW+20%, (f) PCP+20%.

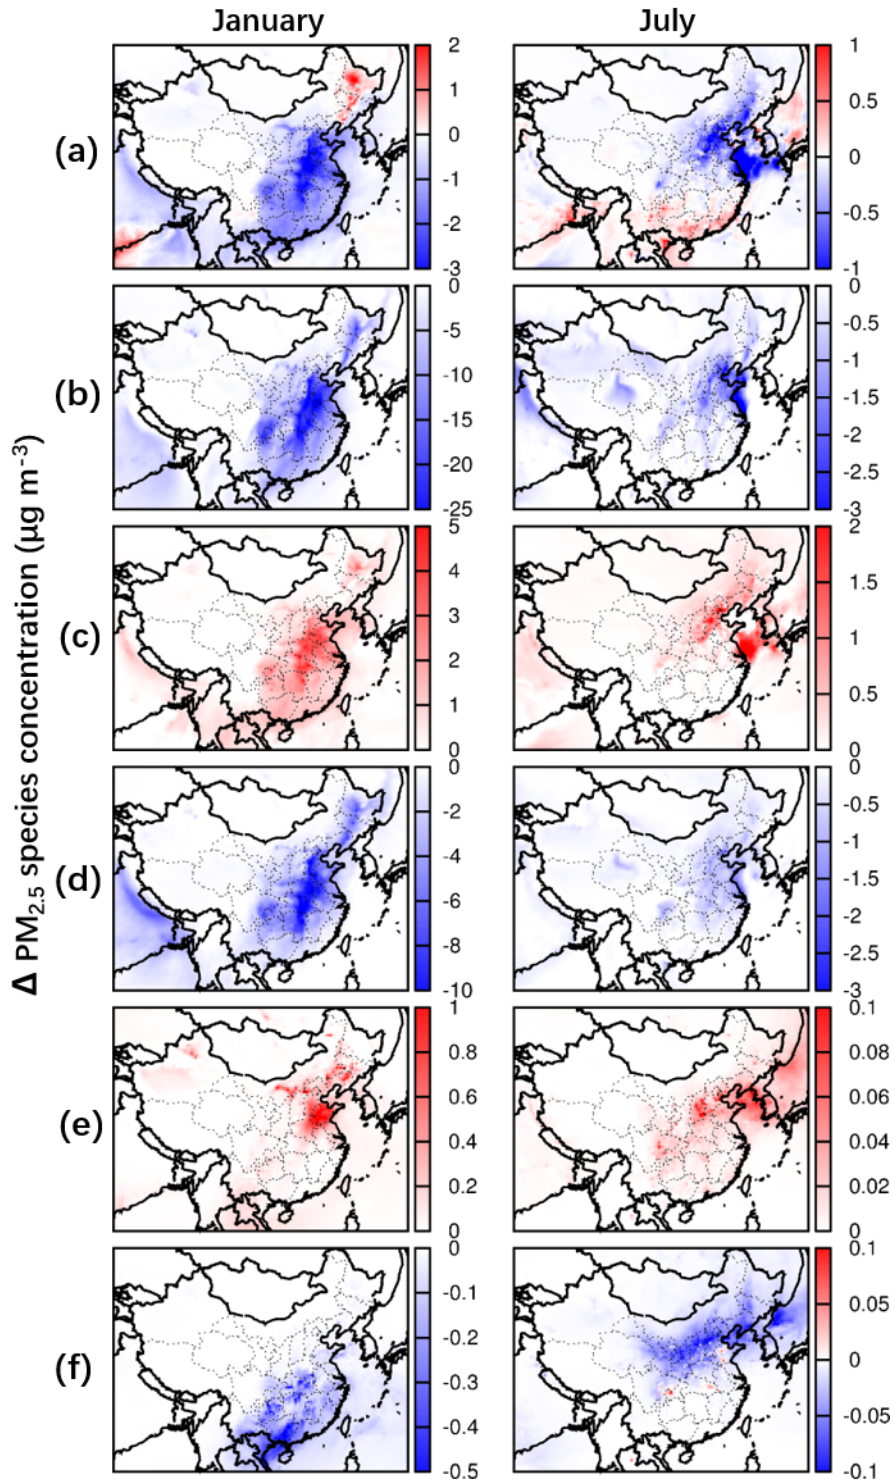

34

35 **Fig.S5** Changes in monthly average  $\text{PM}_{2.5}$  concentration ( $\mu\text{g m}^{-3}$ ) in January and July, 2013 due to

36 (a)  $T+0.5\text{K}$ , (b)  $WS+5\%$ , (c)  $AH+5\%$ , (d)  $PBLH+10\%$ , (e)  $CLW+5\%$ , (f)  $PCP+5\%$ .

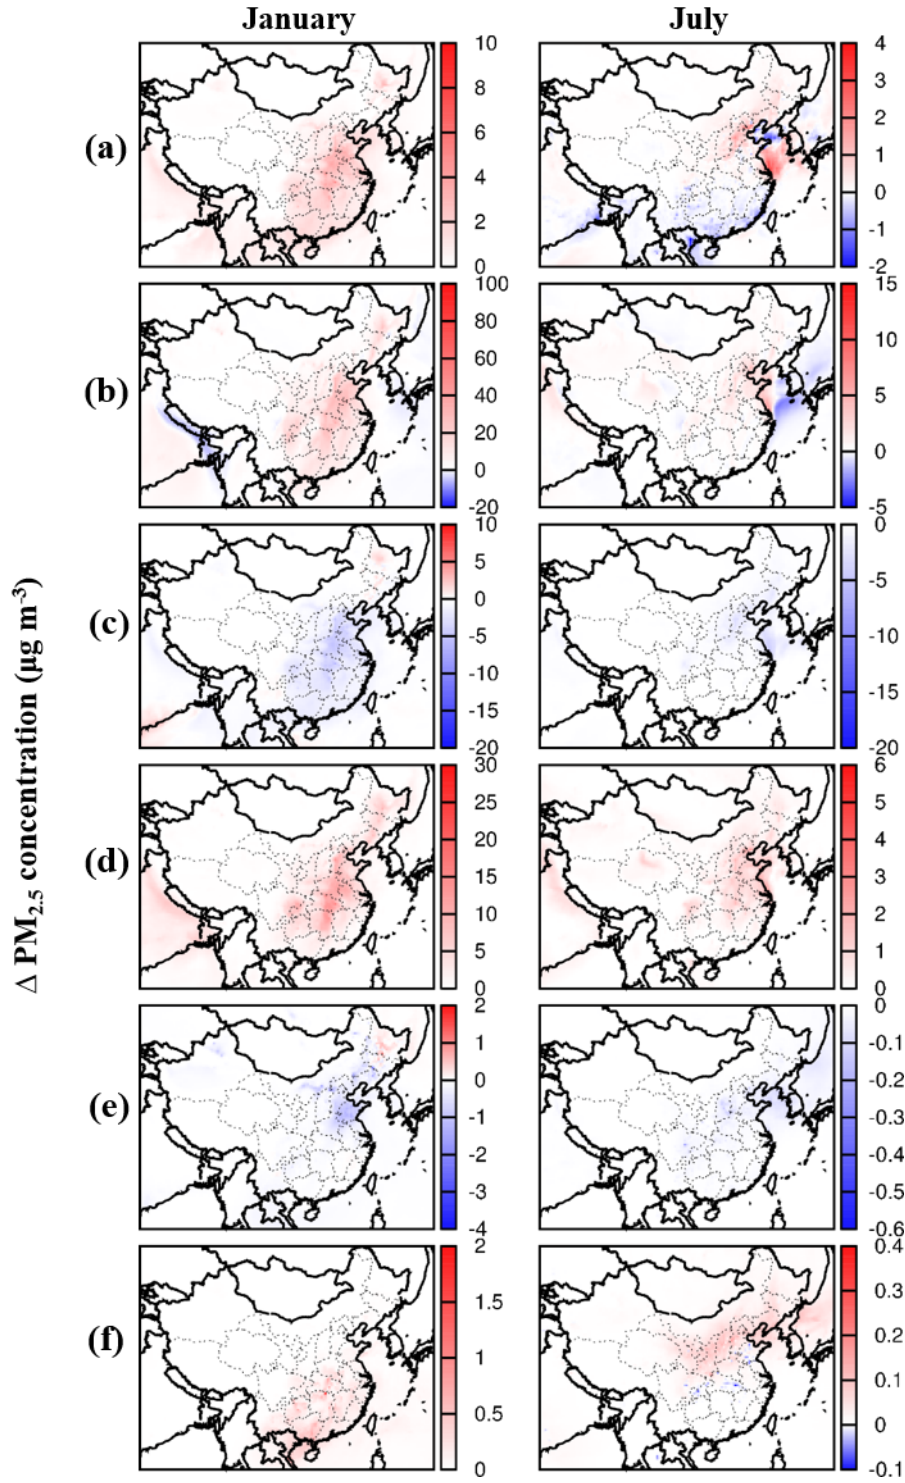

37

38 **Fig.S6** Changes in monthly average  $\text{PM}_{2.5}$  concentration ( $\mu\text{g m}^{-3}$ ) in January and July, 2013 due to

39 (a) T-0.5K, (b) WS-5%, (c) AH-5%, (d) PBLH-10%, (e) CLW-5%, (f) PCP-5%.

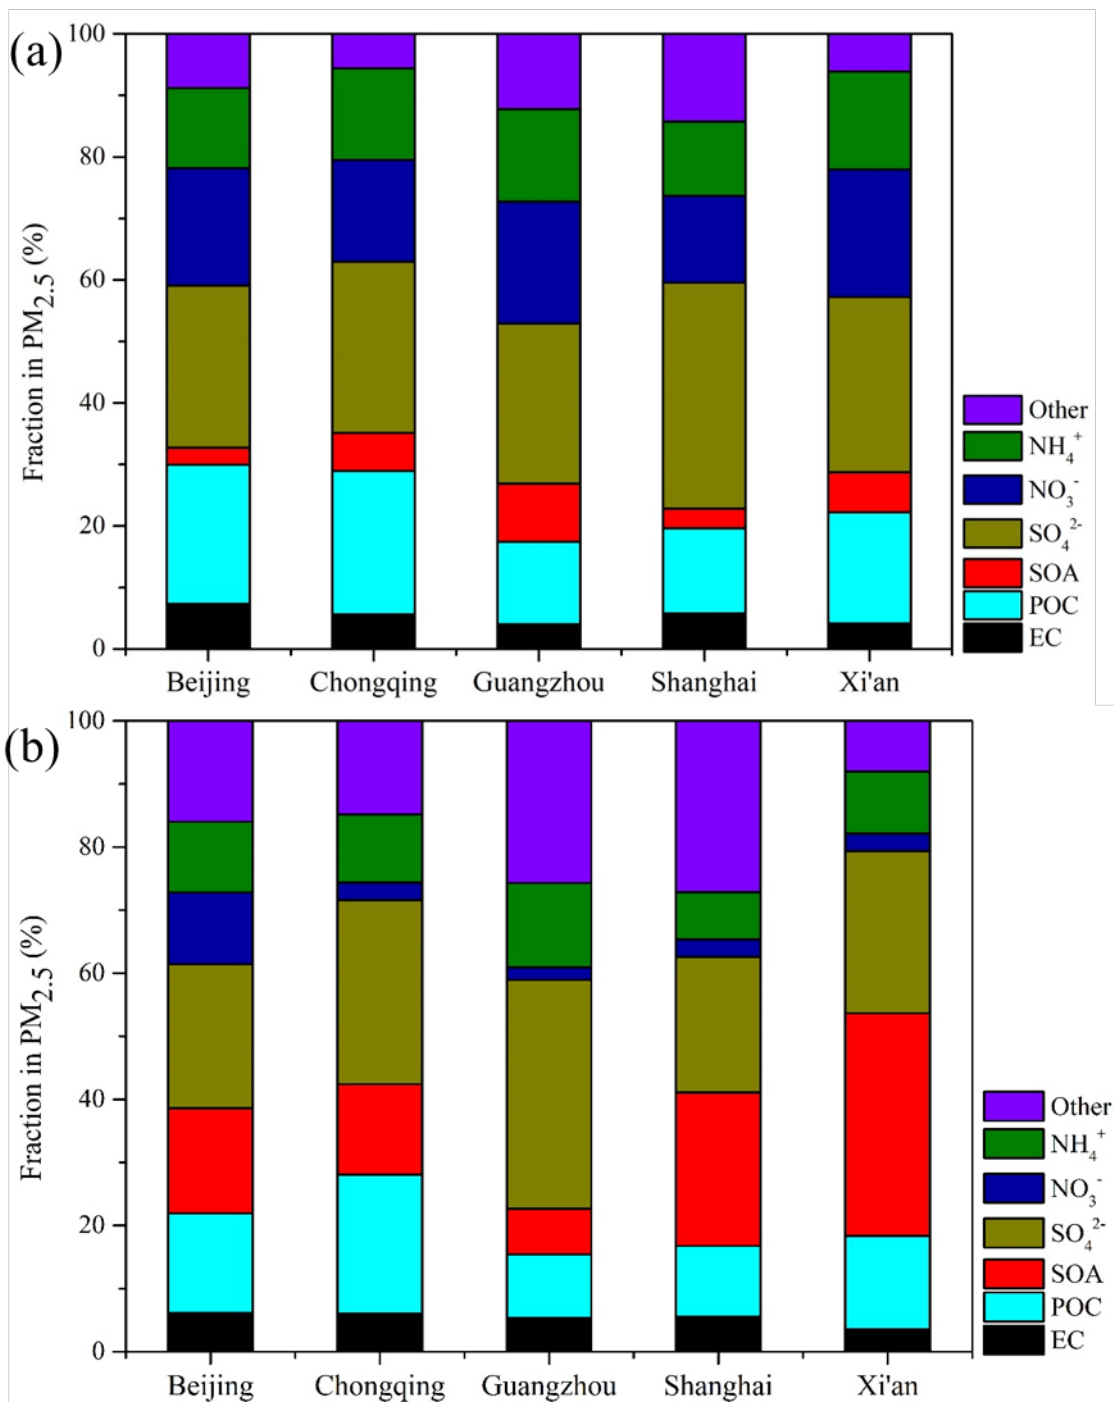

40  
41 **Fig.S7** The monthly average fraction of different components in PM<sub>2.5</sub> in (a) January and (b) July.  
42  
43



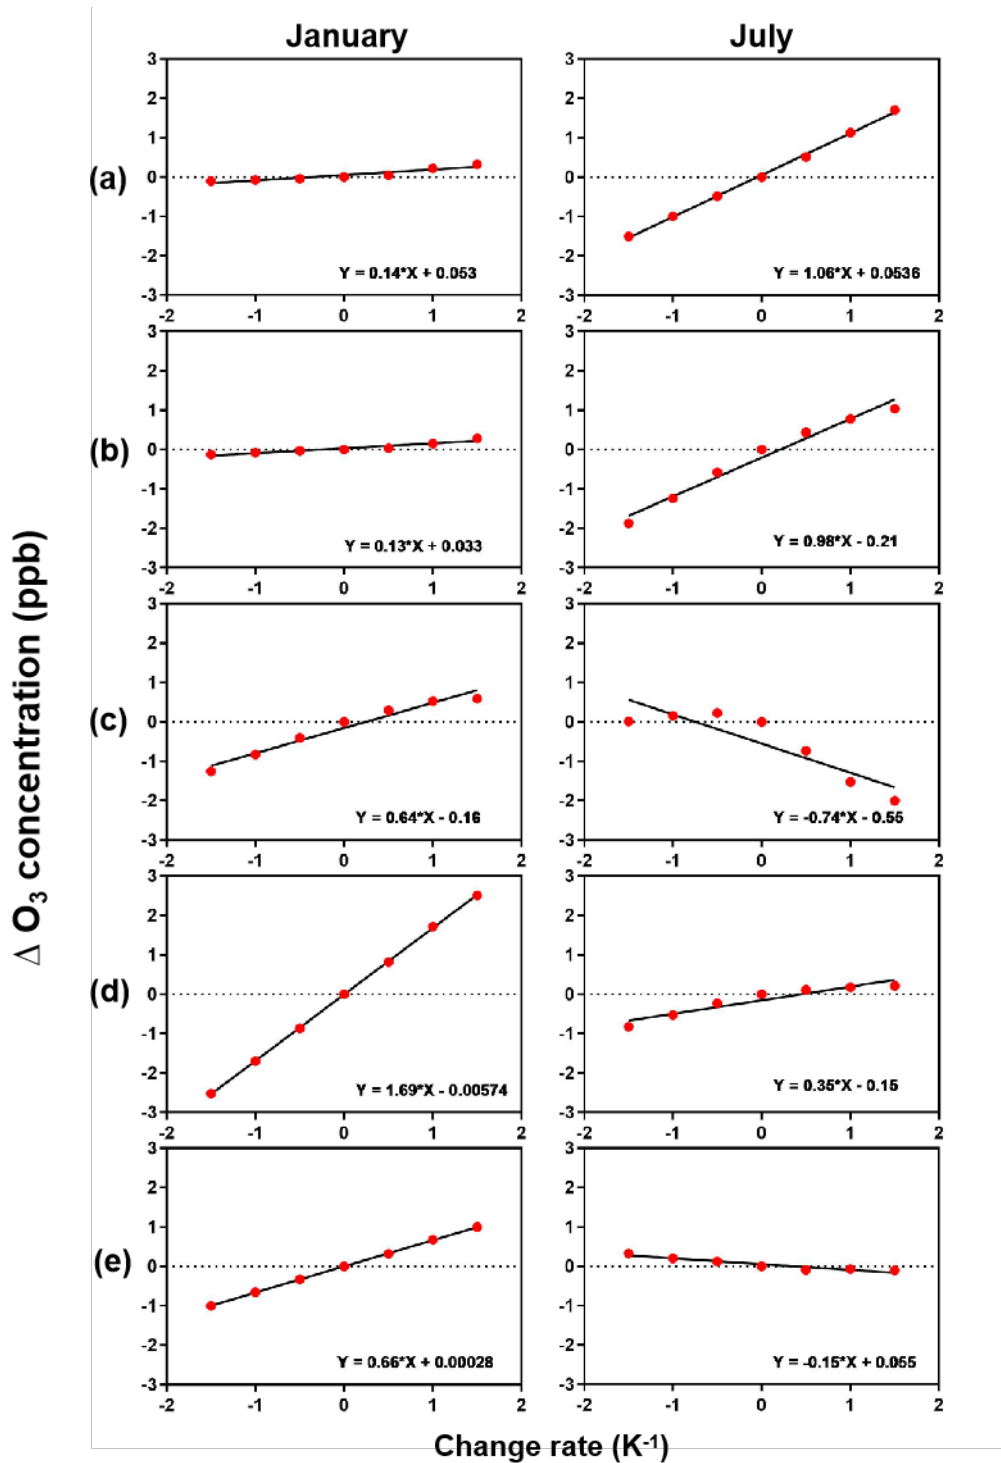

44

45 **Fig.S8** Changes of  $O_3$ -8h concentration (ppb) in January and July 2013 caused by temperature  
 46 perturbation: (a) is Beijing; (b) is Shanghai; (c) is Guangzhou; (d) is Chongqing; (e) is Xi'an

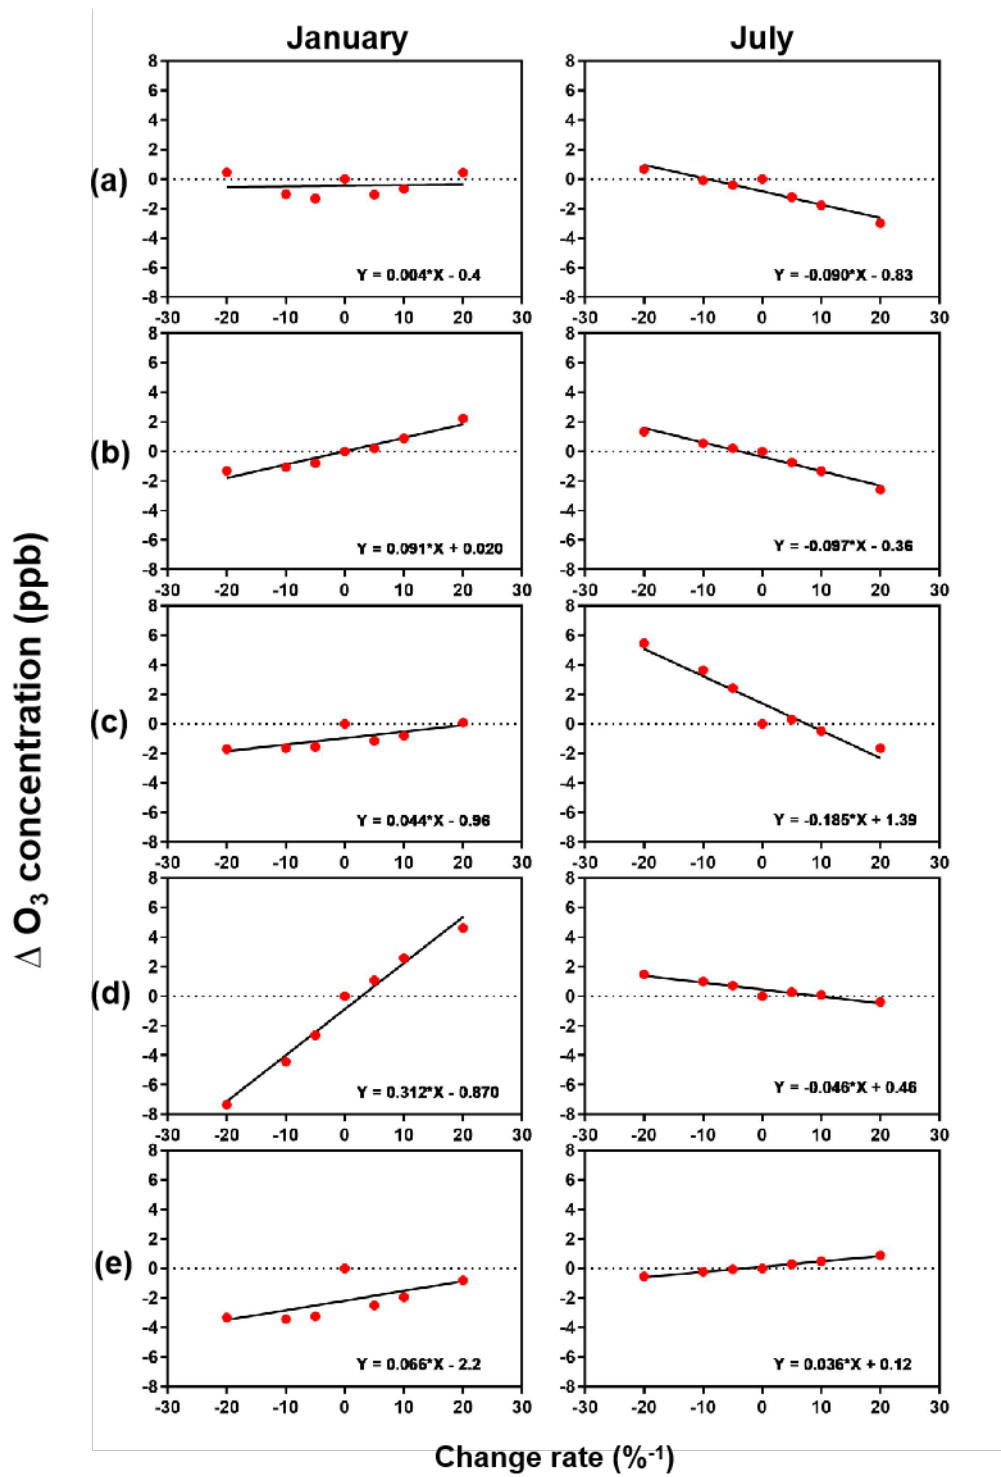

47

48

**Fig.S9** Same as Fig. S8, but meteorological perturbation is wind speed.

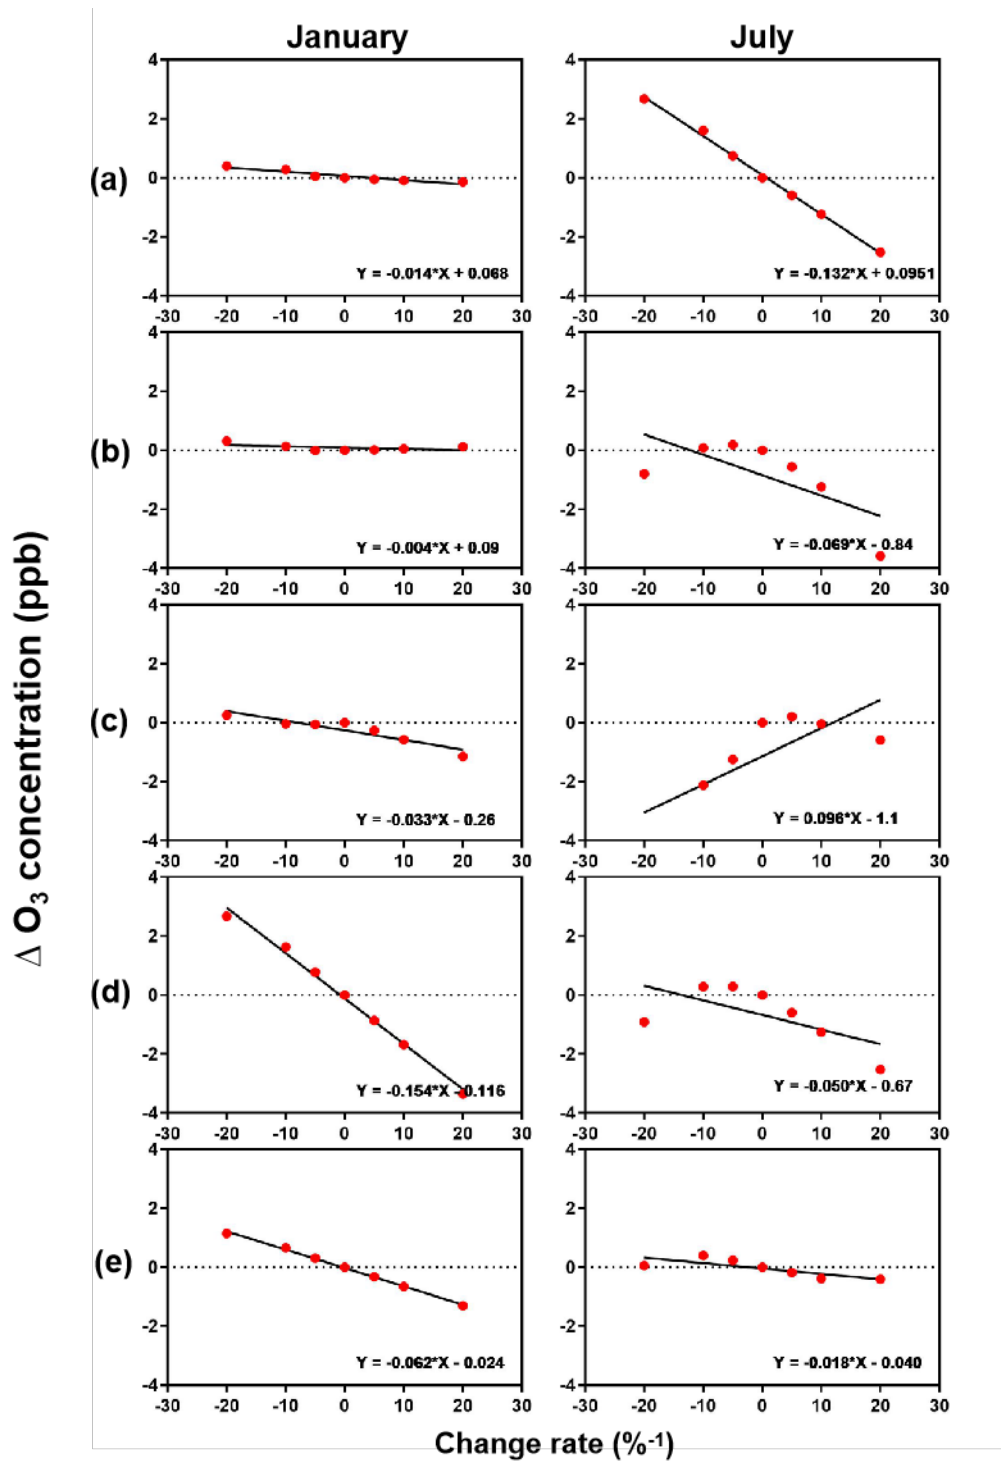

49

50

**Fig.S10** Same as Fig. S8, but meteorological perturbation is relative humidity.

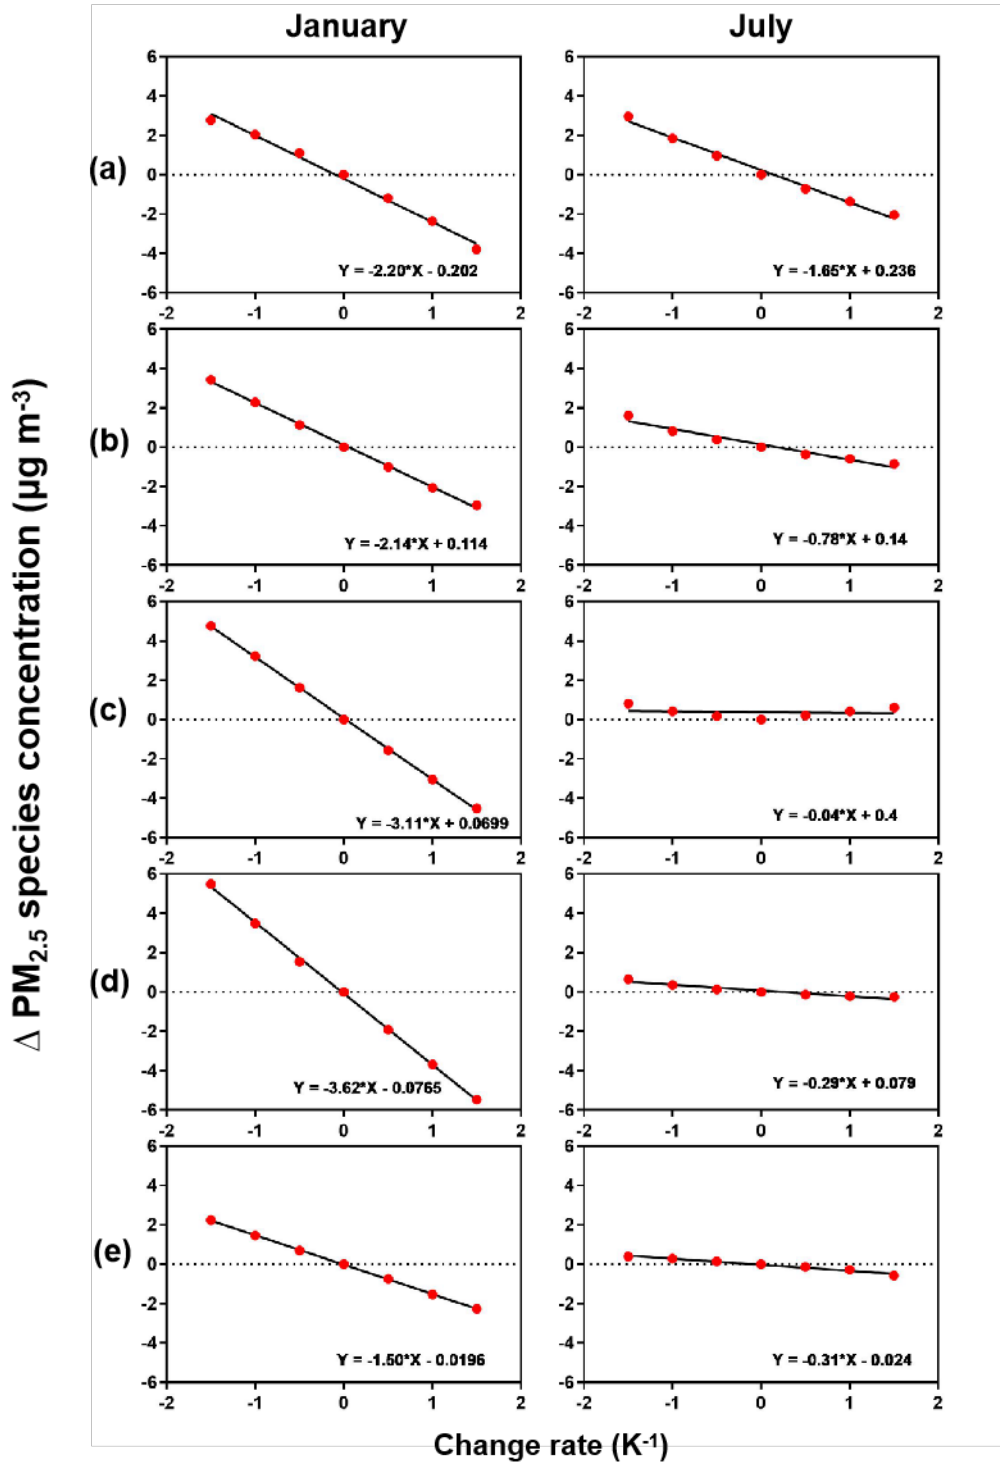

51

52 **Fig.S11** Change of total  $\text{PM}_{2.5}$  concentration ( $\mu\text{g m}^{-3}$ ) in January and July 2013 caused by  
 53 temperature perturbation: (a) is Beijing; (b) is Shanghai; (c) is Guangzhou; (d) is Chongqing; (e) is  
 54 Xi'an.

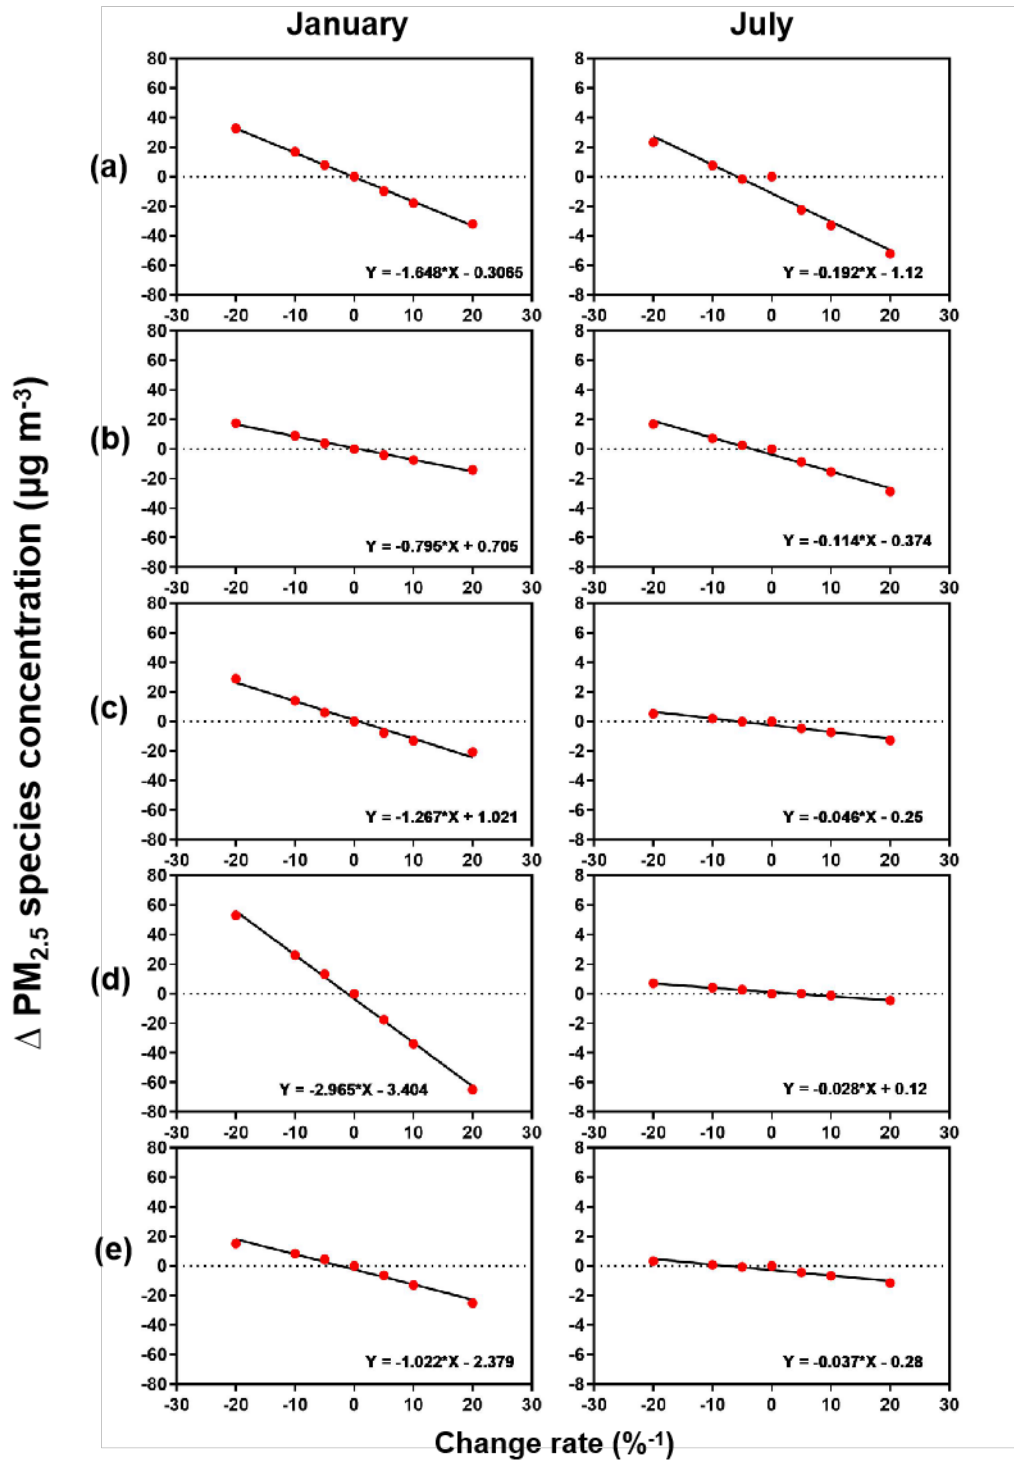

55

56

Fig.S12 Same as Fig.S11, but meteorological perturbation is wind speed.

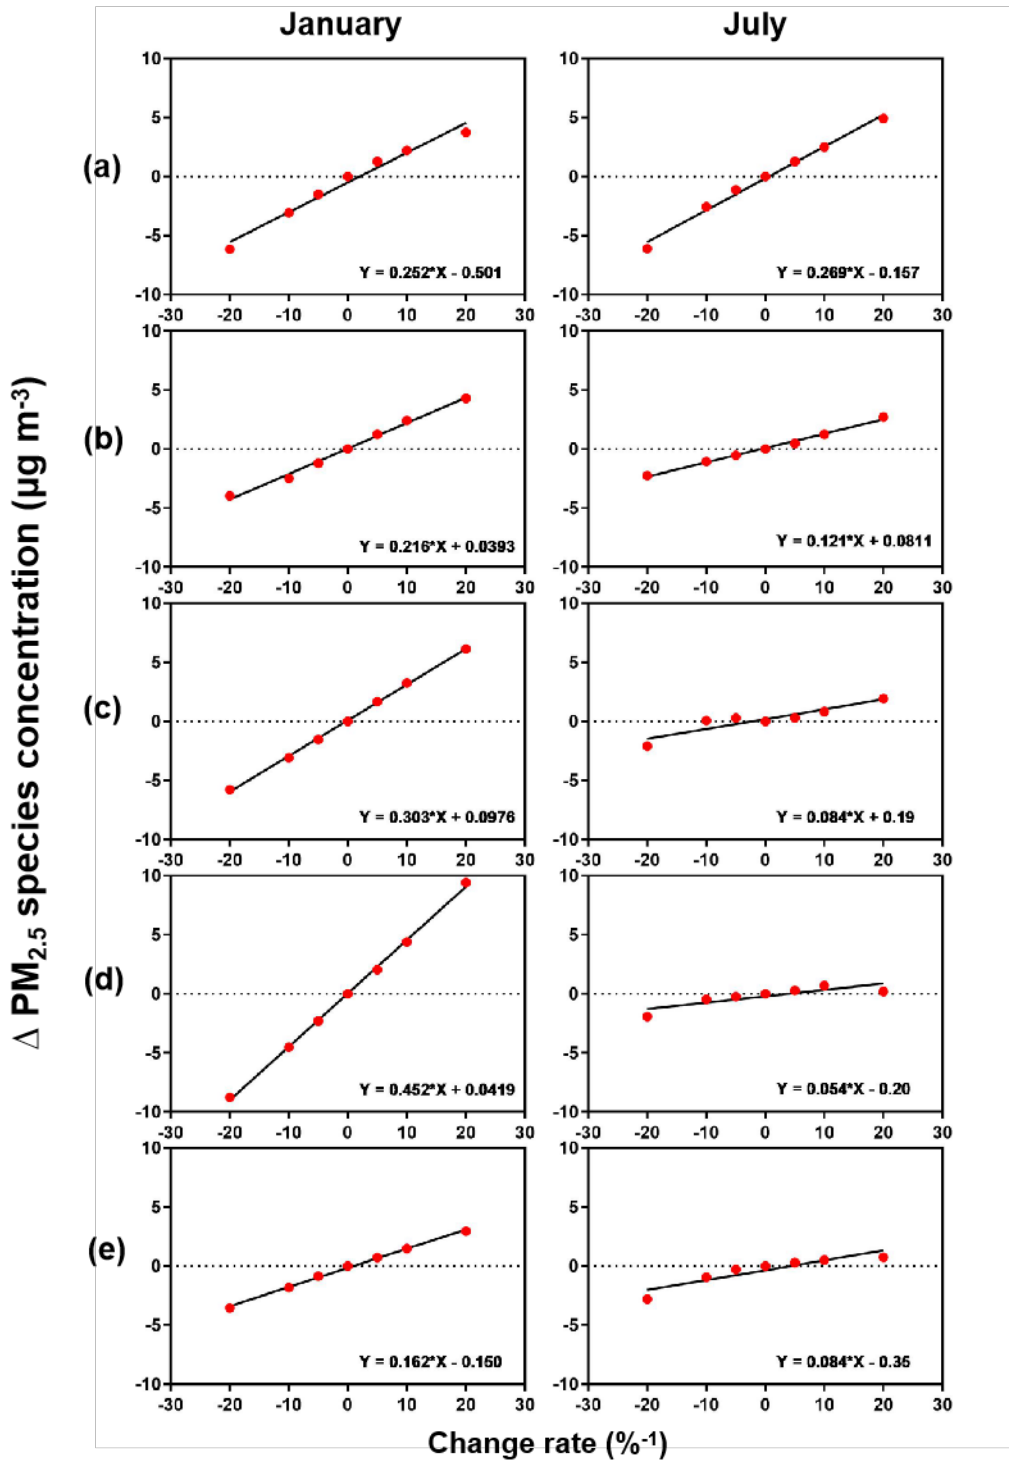

57

58

59

Fig.S13 Same as Fig. S11, but meteorological perturbation is relative humidity.
